# Supplementary material for: A Seven-Marker Signature and Clinical Outcome in Malignant Melanoma: A Large-Scale Tissue-Microarray Study with Two Independent Patient Cohorts
Source: PubMed Central journal article supplement (PMC3369875; doi:10.1371/journal.pone.0038222), 2012-06-07

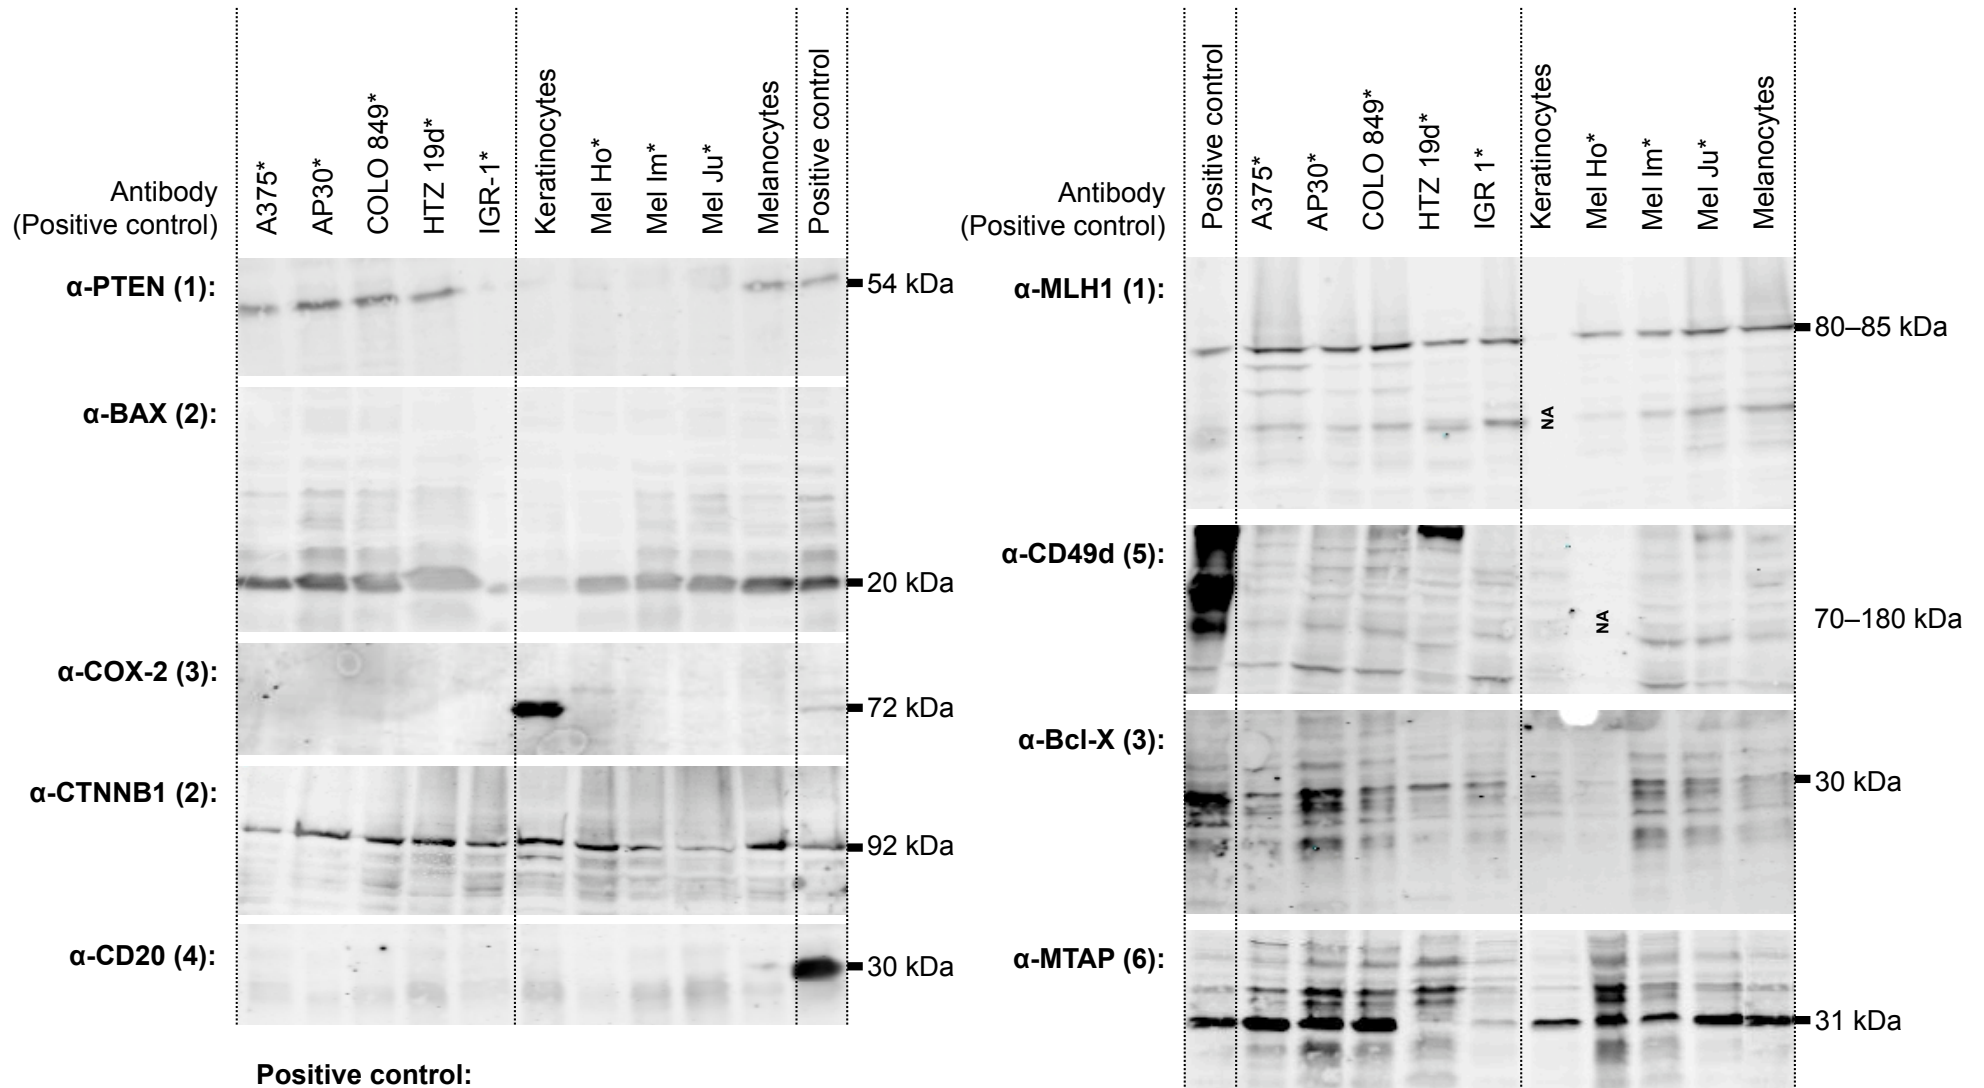

Supplement: pone.0038222.s001.pdf [file pone.0038222.s001.pdf]
