# Supplementary material for: A Seven-Marker Signature and Clinical Outcome in Malignant Melanoma: A Large-Scale Tissue-Microarray Study with Two Independent Patient Cohorts
Source: PubMed Central journal article supplement (PMC3369875; doi:10.1371/journal.pone.0038222), 2012-06-07
Supplement: pone.0038222.s002.pdf [file pone.0038222.s002.pdf]

**Block diagram of cell pellet microarray**

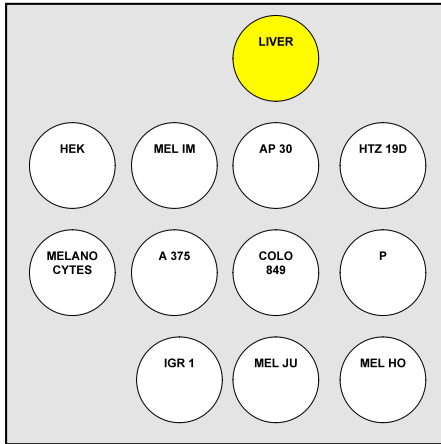

**Catenin-beta**

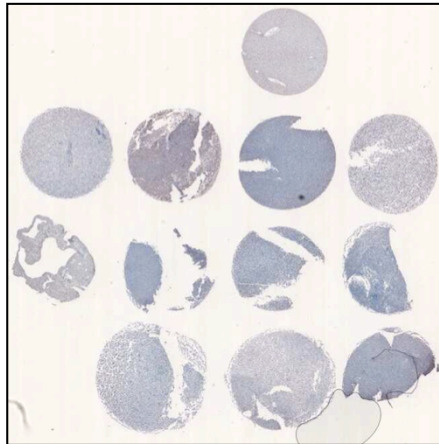

**Bax**

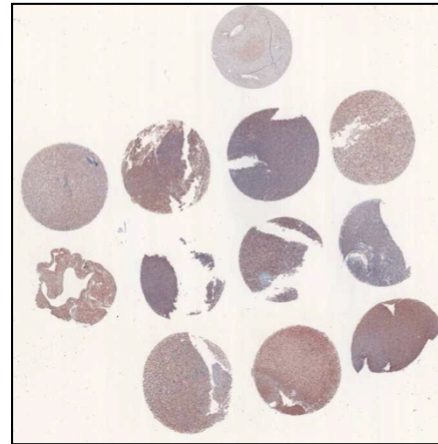

**Bcl-X**

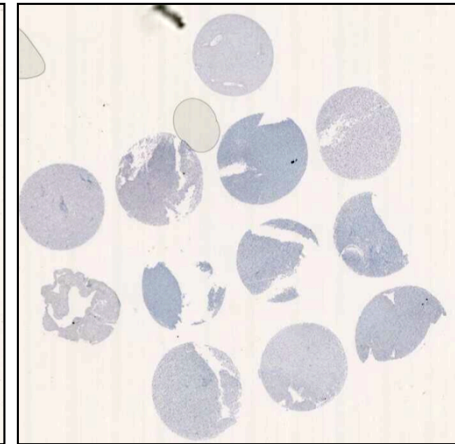

**CD20**

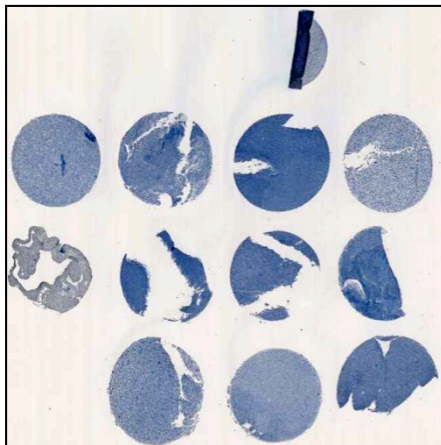

**COX-2**

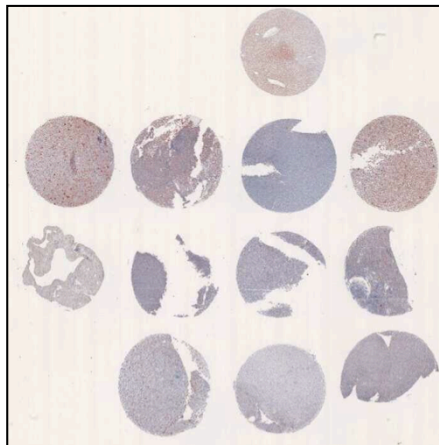

**PTEN**

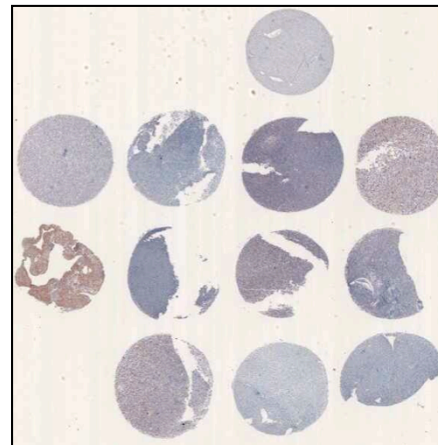

**MTAP**

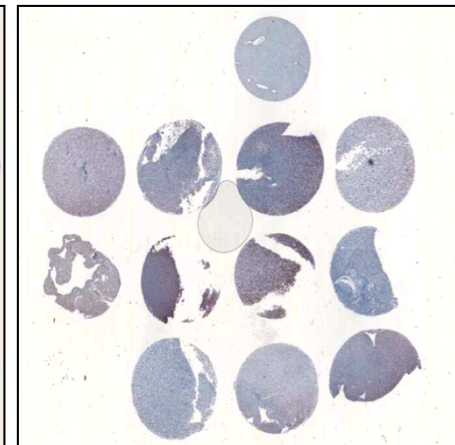

**Weblink to slides:**

<http://histodb2.usz.ch/dss/searchURL.php?outputFormat=viewer&category=conference&confHash=-275761229>
