# Supplementary material for: A Seven-Marker Signature and Clinical Outcome in Malignant Melanoma: A Large-Scale Tissue-Microarray Study with Two Independent Patient Cohorts
Source: PubMed Central journal article supplement (PMC3369875; doi:10.1371/journal.pone.0038222), 2012-06-07

# A Nodular malignant melanoma, Breslow 1.7 mm, Clark level IV (Example #1)

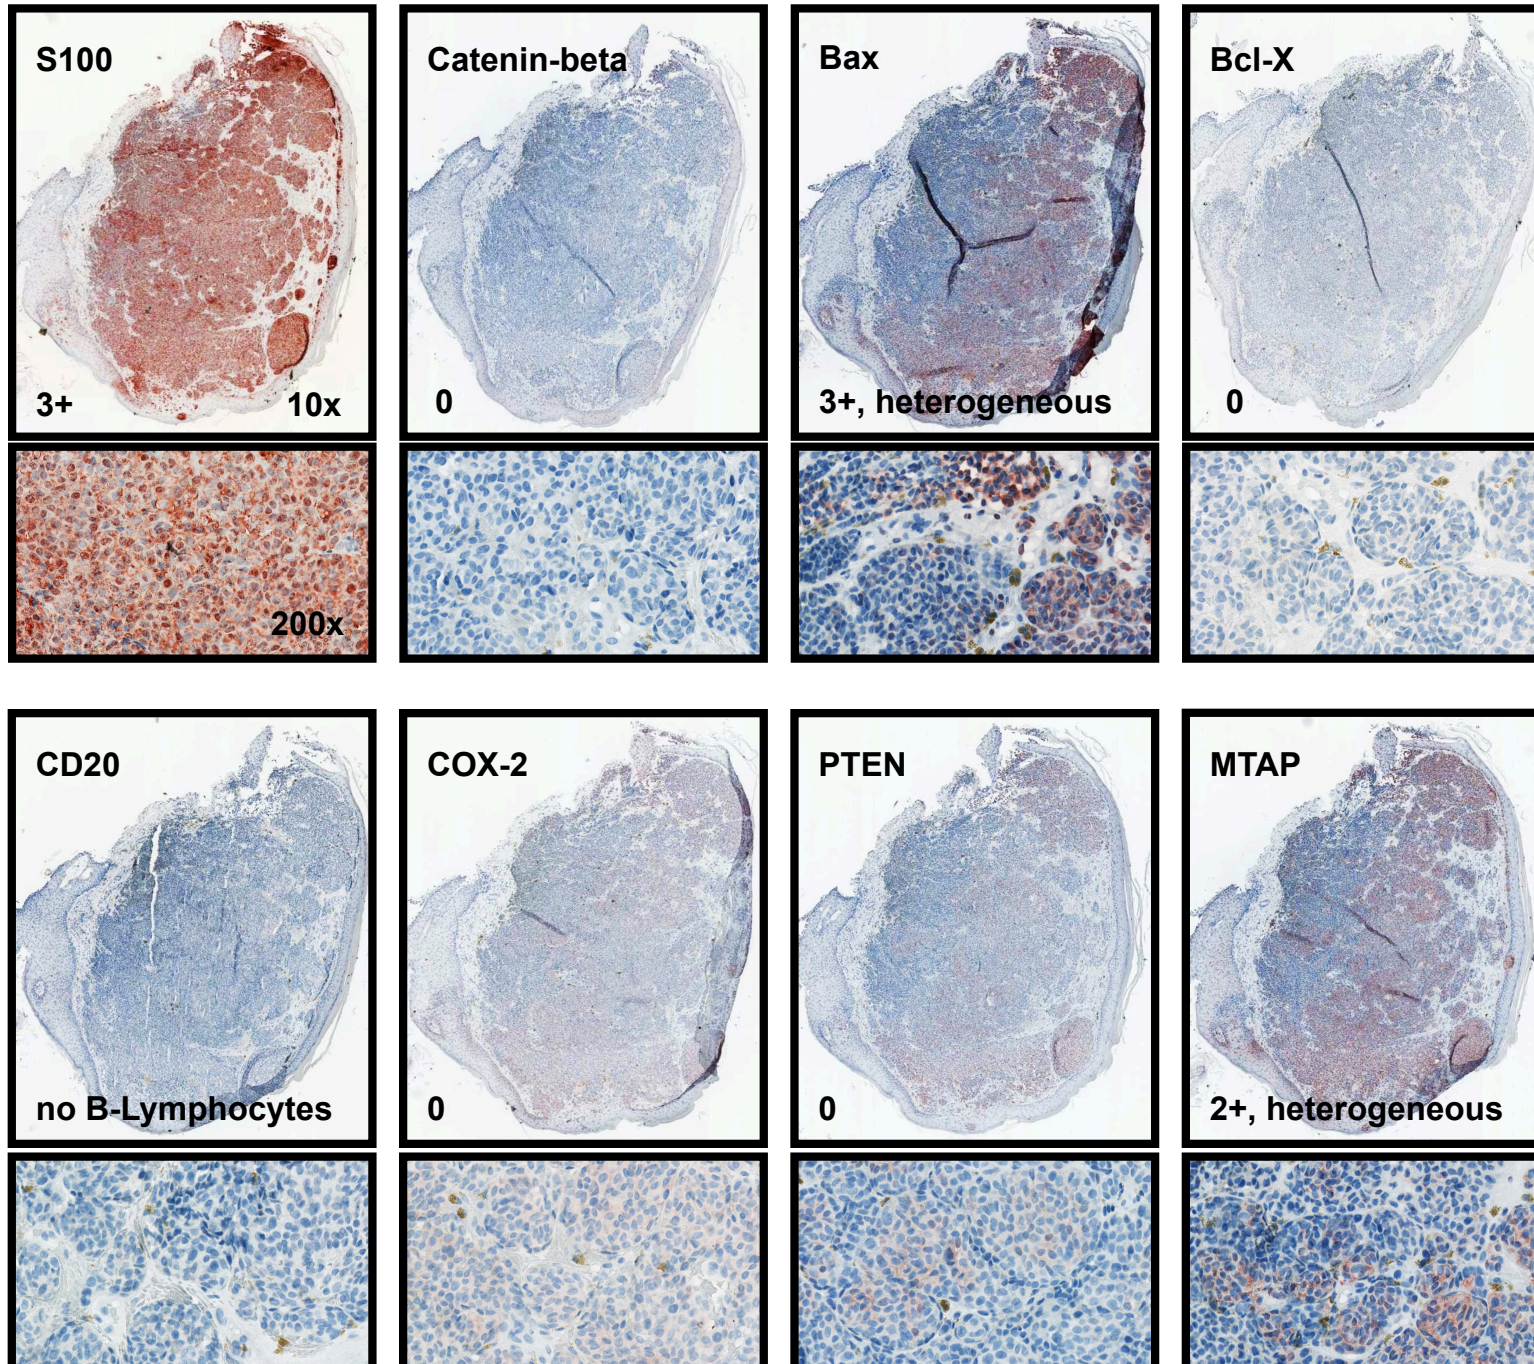

**B Malignant melanoma, Breslow 1.3 mm, Clark level IV (Example #2)**

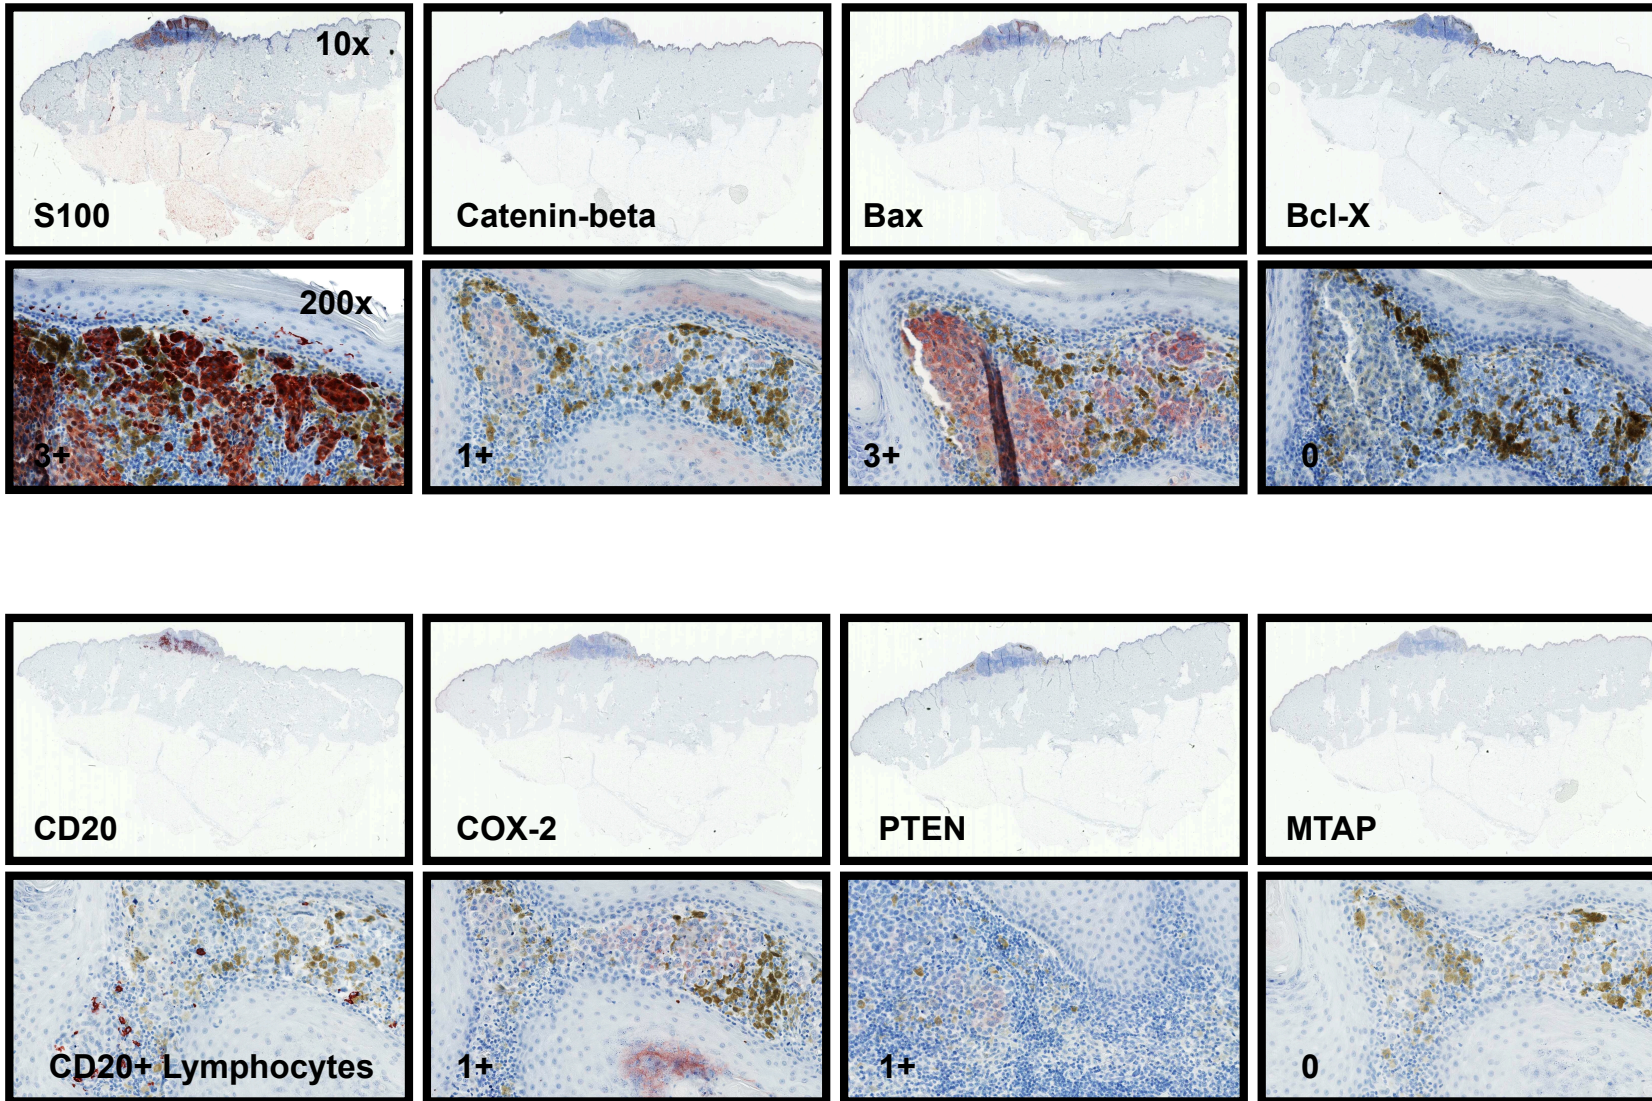

**C Superficial spreading melanoma, Breslow 0.15 mm, Clark level II (Example #3)**

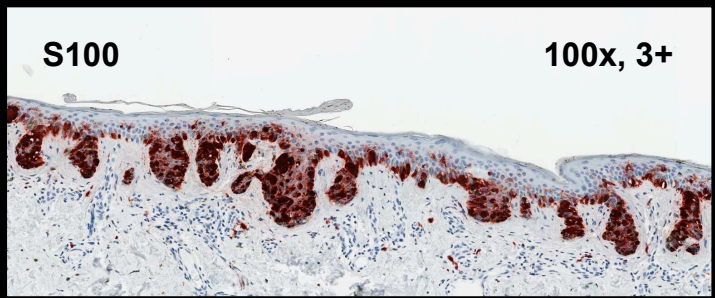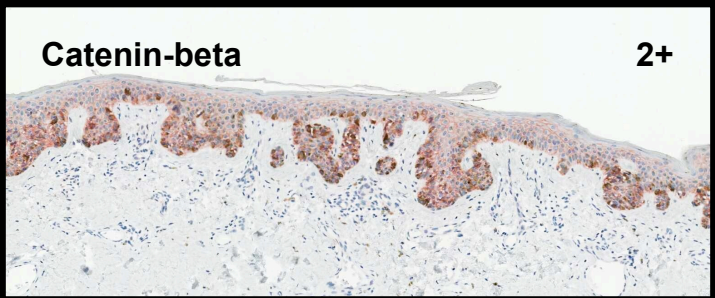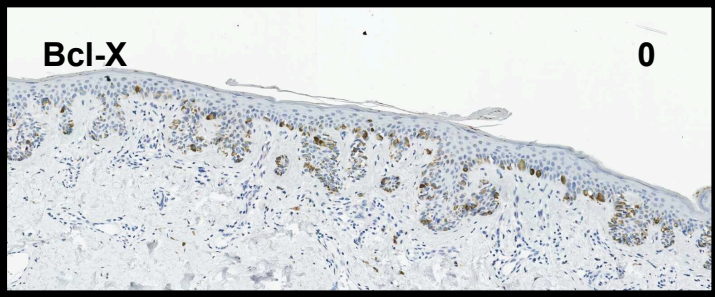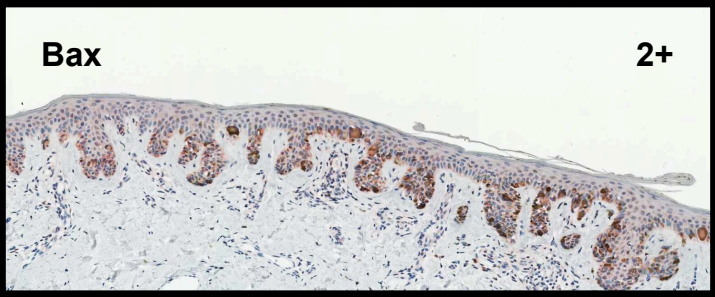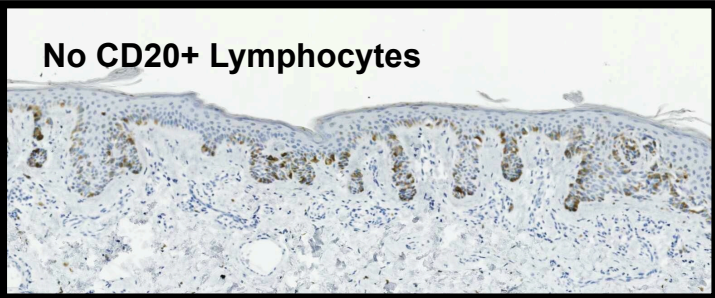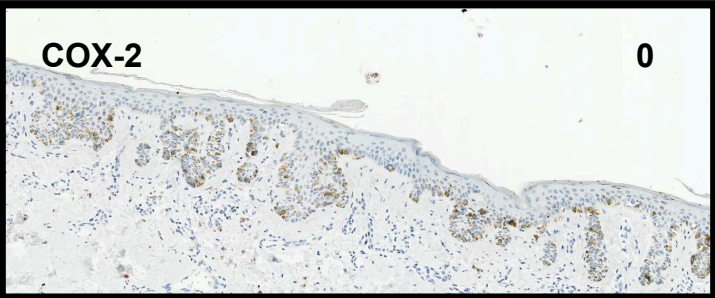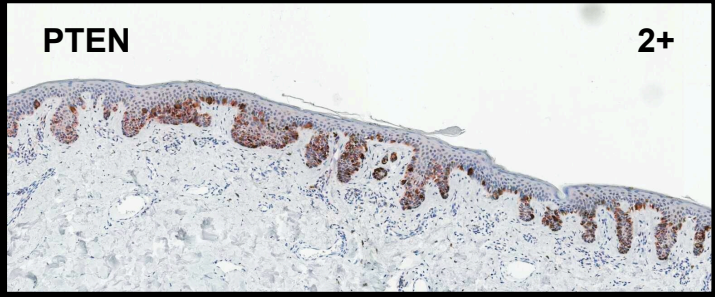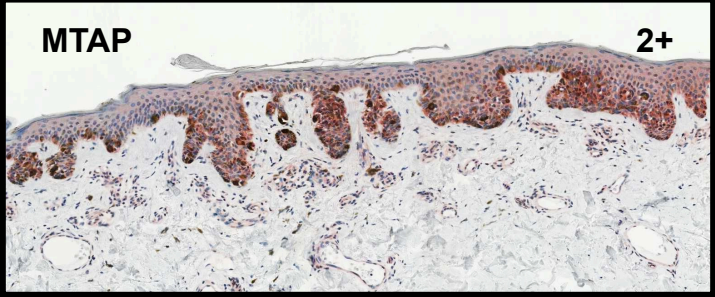

# D Lentigo maligna melanoma, Breslow 1.2 mm, Clark level IV (Example #4)

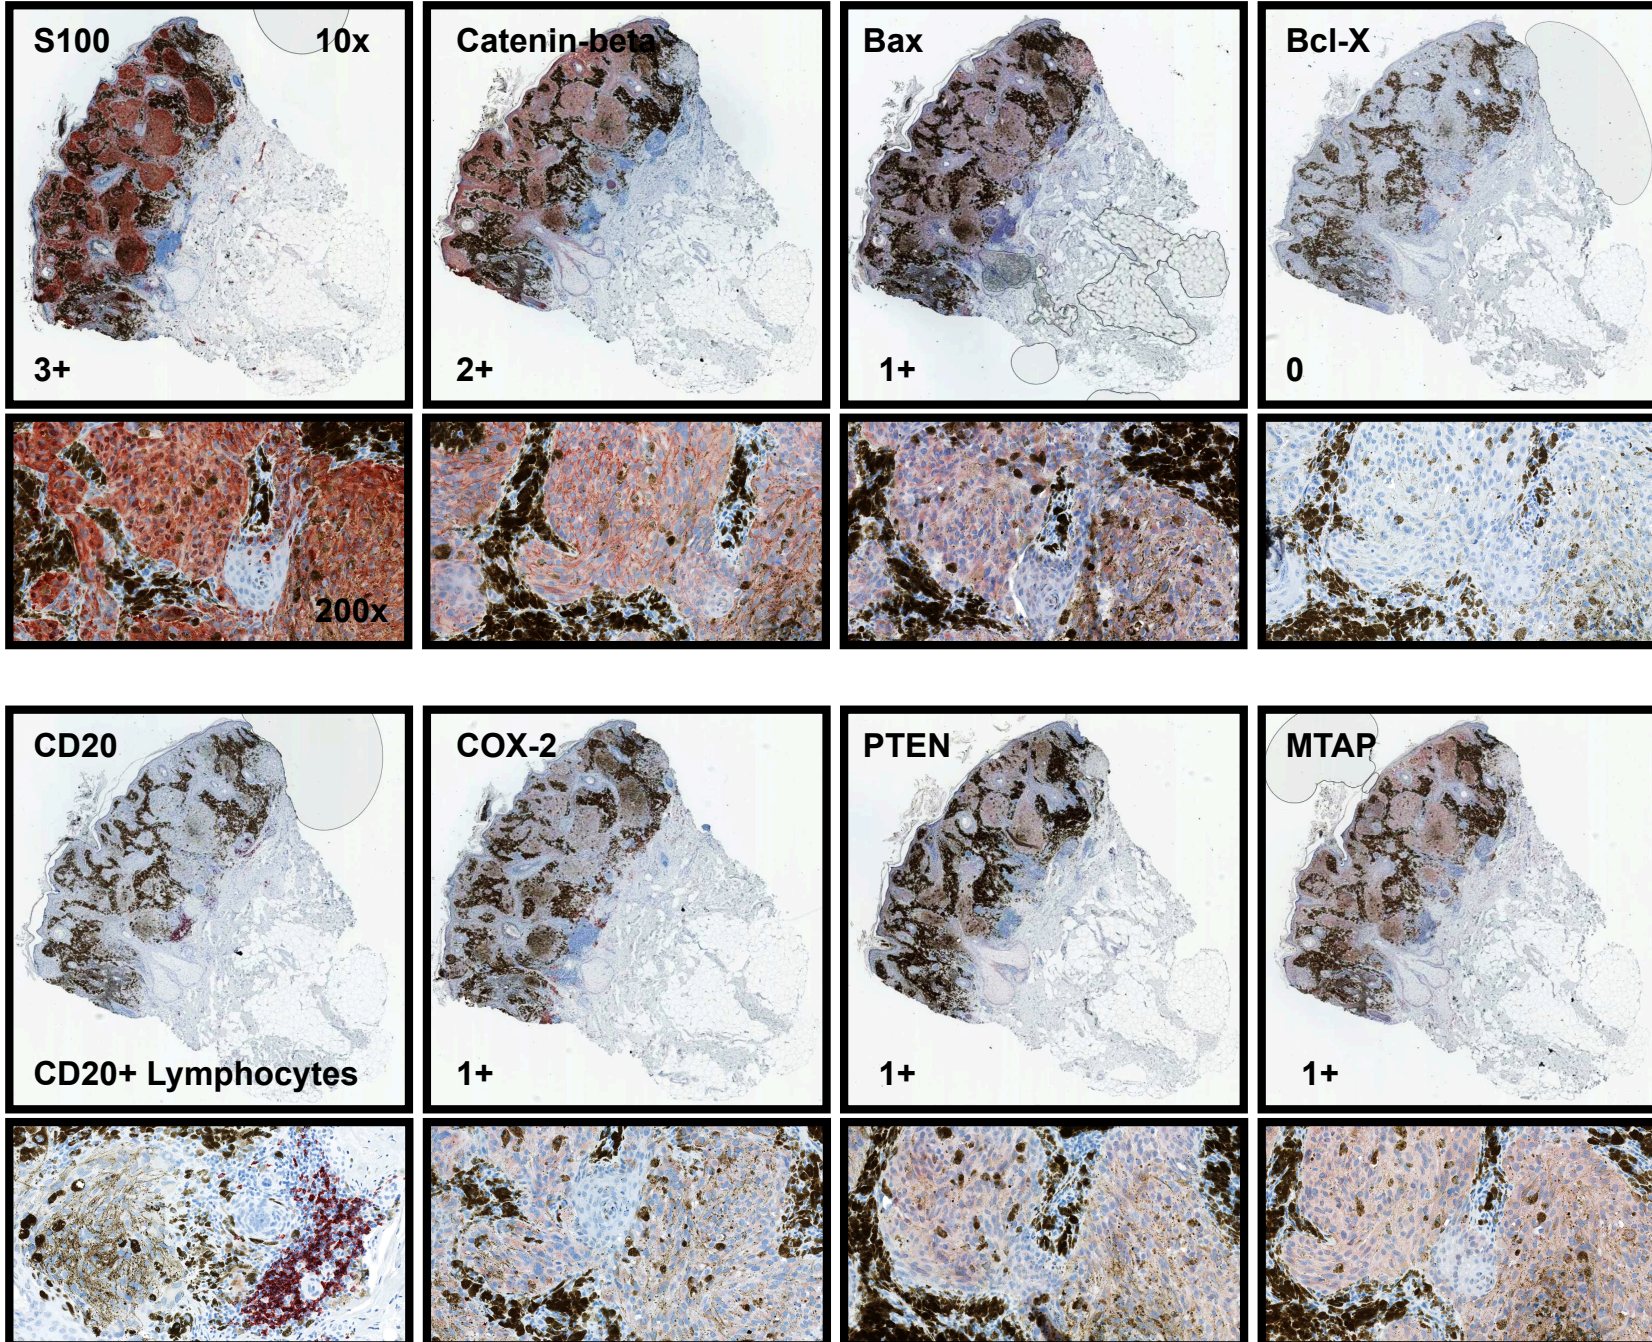

Supplement: pone.0038222.s003.pdf [file pone.0038222.s003.pdf]
