# Supplementary material for: A Seven-Marker Signature and Clinical Outcome in Malignant Melanoma: A Large-Scale Tissue-Microarray Study with Two Independent Patient Cohorts
Source: PubMed Central journal article supplement (PMC3369875; doi:10.1371/journal.pone.0038222), 2012-06-07

**Prostate cancer cell lines**

**Melanoma cell lines**

**PC3 (A)**

**LNCaP (B)**

**IGR-1 (C)**

**HTZ-19d (D)**

**PTEN**

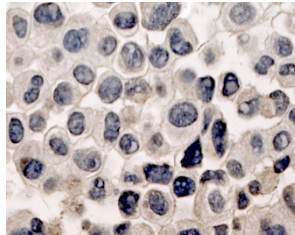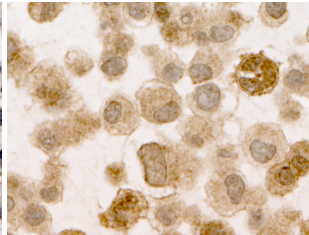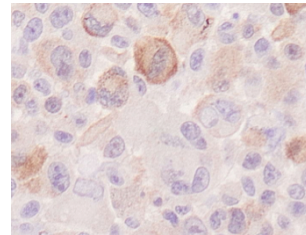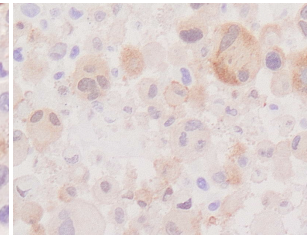

**P-Akt  
(Ser473)**

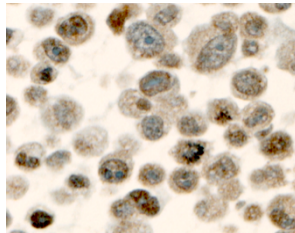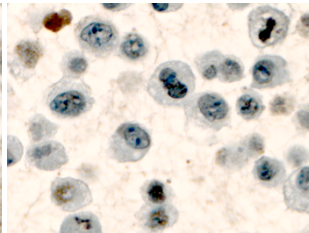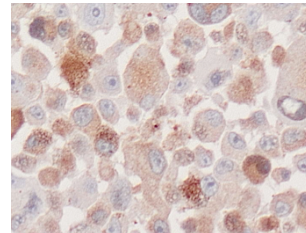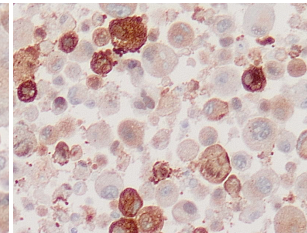

**P-S6  
ribosomal  
protein  
(Ser235/236)**

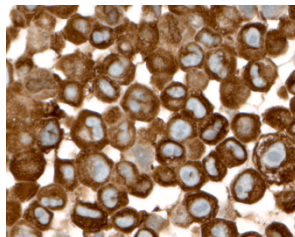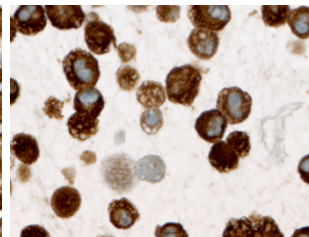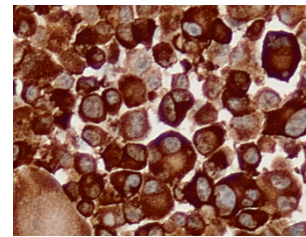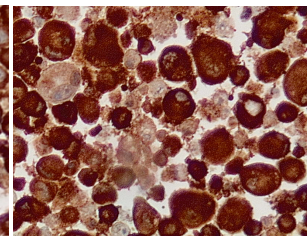

Supplement: pone.0038222.s005.pdf [file pone.0038222.s005.pdf]
