# Supplementary material for: A Seven-Marker Signature and Clinical Outcome in Malignant Melanoma: A Large-Scale Tissue-Microarray Study with Two Independent Patient Cohorts
Source: PLoS One. 2012 Jun 7;7(6):e38222. doi: 10.1371/journal.pone.0038222 (PMC3369875; doi:10.1371/journal.pone.0038222)
Supplement: Table S1 — Characterization and comparison of the primary cohort (TMA 1) and the external test cohort (TMA 2). Reported are the number of counts and the associated percentages for all specimens on the tissue microarrays. CD49d and MLH1 are not contained in the final seven-marker signature and therefore were not analyzed on the external test TMA 2. Missing values are listed as “unknown”. (XLS) [file pone.0038222.s006.xls]

## Sheet: Table_S2_RB
Supplementary Table S1
		Primary cohort				Ext. Test cohort
	TMA characteristics		N	%		N	%
	Origin		Regensburg			Hamburg
	Patients
		No. of patients	364			235
		No. follow-up	364	100		231	98.3
		No. of patients with at least 1 signature marker	362	99.5		225	95.7
	TMA Spots
		No. of biomarkers	70			7
		Valid spots	23106	90.7		1541	93.7
		Missing spots	2374	9.3		104	6.3
	Clinicopathological characteristics		N	%		N	%
	Age
		<=60	180	49.5		139	59.1
		>60	184	50.5		92	39.1
		unknown	0	0		4	1.7
	Sex
		Male	195	53.6		126	53.6
		Female	169	46.4		105	44.7
		unknown	0	0		4	1.7
	Tumor thickness
		<= 1mm	163	44.8		110	46.8
		1.01--2mm	92	25.3		47	20
		2.01--4mm	61	16.8		36	15.3
		> 4mm	42	11.5		36	15.3
		unknown	6	1.6		6	2.6
	Clark level
		1	2	0.5		1	0.4
		2	75	20.6		39	16.6
		3	106	29.1		80	34
		4	149	40.9		90	38.3
		5	14	3.8		19	8.1
		unknown	18	4.9		6	2.6
	Growth pattern
		SSM	170	46.7		146	62.1
		NMM	56	15.4		49	20.9
		LMM	42	11.5		12	5.1
		ALM	28	7.7		8	3.4
		NOS	68	18.7		20	8.5
	Nodal status
		N0	319	87.6		210	89.4
		N1	12	3.3		10	4.3
		N2	7	1.9		2	0.9
		N3	4	1.1		1	0.4
		unknown	22	6		12	5.1
	Ulceration
		No	289	79.4		205	87.2
		Yes	53	14.6		26	11.1
		unknown	22	6		4	1.7
	Immunohistochemical data		N	%		N	%
	Bax
		0	5	1.4		5	2.1
		1	60	16.5		49	20.9
		2	95	26.1		81	34.5
		3	88	24.2		56	23.8
		4	88	24.2		29	12.3
		unknown	28	7.7		15	6.4
	b-Catenin
		0	10	2.7		4	1.7
		1	121	33.2		43	18.3
		2	106	29.1		108	46
		3	71	19.5		53	22.6
		4	17	4.7		11	4.7
		unknown	39	10.7		16	6.8
	Intratumoral CD20 positive B-lymphocytes
		0	333	91.5		154	65.5
		1	12	3.3		48	20.4
		2	4	1.1		16	6.8
		3	1	0.3		1	0.4
		unknown	14	3.8		16	6.8
	BCL-X
		0	151	41.5		66	28.1
		1	167	45.9		117	49.8
		2	26	7.1		38	16.2
		3	1	0.3		4	1.7
		unknown	19	5.2		10	4.3
	MTAP
		0	56	15.4		103	43.8
		1	245	67.3		101	43
		2				16	6.8
		unknown	63	17.3		15	6.4
	PTEN
		0	57	15.7		23	9.8
		1	140	38.5		87	37
		2	116	31.9		76	32.3
		3	28	7.7		25	10.6
		4	4	1.1		8	3.4
		unknown	19	5.2		16	6.8
	Cox-2
		0	121	33.2		20	8.5
		1	188	51.6		103	43.8
		2	39	10.7		73	31.1
		3	5	1.4		21	8.9
		4				2	0.9
		unknown	11	3		16	6.8
	CD49d
		0	63	17.3		n.a
		1	137	37.6
		2	78	21.4
		3	33	9.1
		4	3	0.8
		unknown	50	13.7
	MLH1
		0	65	17.9		n.a
		1	130	35.7
		2	99	27.2
		3	37	10.2
		4	13	3.6
		unknown	20	5.5
